# Supplementary material for: Association between the intake of animal offal and depressive symptoms: a TCLSIH cohort study
Source: Royal Society of Chemistry journal article supplement (doi:10.1039/d2fo03311a), 2023-01-01
Supplement: d2fo03311a1.pdf [file d2fo03311a1.pdf]

**Supplementary Table 1.** Baseline characteristics of participants in the TCLSIH Cohort Study (n=7,745) <sup>a</sup>

| Characteristics                                 | All                     | Men (57.6%)             | Women (42.4%)           |
|-------------------------------------------------|-------------------------|-------------------------|-------------------------|
| No. of participants                             | 7,745                   | 4,460                   | 3,285                   |
| Age (years)                                     | 37.3 (31.5, 45.8)       | 38.4 (32.2, 47.0)       | 35.8 (31.0, 44.3)       |
| BMI (kg/m <sup>2</sup> )                        | 24.2 (21.7, 26.8)       | 25.5 (23.3, 27.8)       | 22.2 (20.4, 24.6)       |
| WC (cm)                                         | 82.0 (74.0, 90.0)       | 88.0 (81.0, 94.0)       | 73.0 (68.0, 80.0)       |
| TC (mmol/L)                                     | 4.63 (4.09, 5.24)       | 4.70 (4.15, 5.30)       | 4.54 (4.03, 5.14)       |
| TG (mmol/L)                                     | 1.07 (0.75, 1.63)       | 1.31 (0.92, 1.95)       | 0.84 (0.63, 1.17)       |
| LDL-C (mmol/L)                                  | 2.69 (2.20, 3.23)       | 2.80 (2.31, 3.33)       | 2.54 (2.10, 3.05)       |
| HDL-C (mmol/L)                                  | 1.32 (1.10, 1.60)       | 1.20 (1.02, 1.41)       | 1.54 (1.30, 1.81)       |
| FBG (mmol/L)                                    | 5.00 (4.70, 5.30)       | 5.10 (4.80, 5.40)       | 4.80 (4.60, 5.10)       |
| SBP (mmHg)                                      | 120.0 (110.0, 130.0)    | 125.0 (115.0, 135.0)    | 115.0 (105.0, 125.0)    |
| DBP (mmHg)                                      | 75.0 (70.0, 85.0)       | 80.0 (70.0, 85.0)       | 70.0 (65.0, 80.0)       |
| PA (MET × hour/week)                            | 11.6 (4.60, 24.1)       | 13.6 (5.50, 27.8)       | 10.4 (3.90, 20.6)       |
| Total energy intake (kcal/day)                  | 2288.7 (1796.9, 2904.3) | 2421.0 (1914.4, 3040.1) | 2111.4 (1664.6, 2661.4) |
| Staple food intake (g/1000 kcal per day)        | 241.2 (190.2, 312.3)    | 250.9 (197.3, 325.5)    | 230.1 (181.3, 293.2)    |
| Vegetable intake (g/1000 kcal per day)          | 121.4 (91.2, 164.6)     | 120.3 (90.9, 163.5)     | 122.7 (91.6, 166.9)     |
| Fruit intake (g/1000 kcal per day)              | 141.9 (91.4, 209.3)     | 132.3 (84.7, 199.1)     | 152.9 (102.1, 221.7)    |
| Sea food intake (g/1000 kcal per day)           | 13.4 (8.12, 21.7)       | 14.0 (8.48, 23.0)       | 12.5 (7.63, 20.1)       |
| Red meat intake (g/1000 kcal per day)           | 21.5 (13.0, 32.9)       | 24.8 (15.1, 37.1)       | 17.8 (10.7, 27.4)       |
| Total animal offal intake (g/1000 kcal per day) | 1.59 (0.00, 3.66)       | 1.90 (0.00, 4.17)       | 1.26 (0.00, 2.89)       |

|                                                                     |                      |                      |                      |
|---------------------------------------------------------------------|----------------------|----------------------|----------------------|
| Animal liver intake (g/1000 kcal per day)                           | 1.29 (0.00, 2.44)    | 1.48 (0.00, 2.83)    | 1.09 (0.00, 2.05)    |
| animal offal (except for animal liver) intake (g/1000 kcal per day) | 0.00 (0.00, 1.47)    | 0.00 (0.00, 1.62)    | 0.00 (0.00, 1.23)    |
| cholesterol intake (mg/1000 kcal per day)                           | 220.0 (173.6, 279.9) | 224.7 (176.1, 287.1) | 213.9 (170.5, 270.3) |
| saturated fat intake (g/1000 kcal per day)                          | 4.60 (3.61, 5.93)    | 4.78 (3.71, 6.26)    | 4.40 (3.50, 5.56)    |
| Smoking status (%)                                                  |                      |                      |                      |
| Current smoker                                                      | 18.0                 | 30.8                 | 0.71                 |
| Ex-smoker                                                           | 5.45                 | 9.09                 | 0.56                 |
| Non-smoker                                                          | 76.6                 | 60.1                 | 98.7                 |
| Drinking status (%)                                                 |                      |                      |                      |
| Everyday                                                            | 3.10                 | 4.99                 | 0.56                 |
| Sometime                                                            | 61.4                 | 76.5                 | 41.2                 |
| Ex-drinker                                                          | 8.94                 | 8.74                 | 9.21                 |
| Non-drinker                                                         | 26.6                 | 9.78                 | 49.0                 |
| Married (%)                                                         | 85.4                 | 86.3                 | 84.1                 |
| Living alone (%)                                                    | 7.32                 | 8.16                 | 6.16                 |
| Education level (college or higher, %)                              | 80.7                 | 81.2                 | 80.0                 |
| Occupation (%)                                                      |                      |                      |                      |
| Managers                                                            | 51.8                 | 51.9                 | 51.6                 |
| Professionals                                                       | 18.6                 | 22.1                 | 14.0                 |
| Other                                                               | 29.6                 | 26.1                 | 34.4                 |
| Visiting friends (%)                                                | 56.1                 | 51.3                 | 62.6                 |

|                                           |      |      |      |
|-------------------------------------------|------|------|------|
| Household income ( $\geq 10,000$ Yuan, %) | 46.3 | 46.2 | 46.5 |
| <b>Healthy sleep pattern (%)</b>          |      |      |      |
| Healthy                                   | 57.0 | 52.4 | 63.2 |
| Immediate                                 | 31.3 | 33.8 | 27.8 |
| Poor                                      | 11.7 | 13.8 | 9.00 |
| Individual history of disease (%)         |      |      |      |
| Hypertension                              | 21.5 | 30.0 | 10.0 |
| Hyperlipidemia                            | 43.1 | 51.1 | 32.4 |
| Diabetes                                  | 4.82 | 6.64 | 2.34 |
| Family history of disease (%)             |      |      |      |
| CVD                                       | 33.9 | 33.5 | 34.5 |
| Hypertension                              | 55.5 | 55.3 | 55.9 |
| Hyperlipidemia                            | 0.46 | 0.44 | 0.49 |
| Diabetes                                  | 29.3 | 27.9 | 31.3 |

---

<sup>a</sup> Continuous variables are expressed as medians (P25, P75) and categorical variables are expressed as percentages. BMI, body mass index; CVD, cardiovascular disease; DBP, diastolic blood pressure; FBG, fasting blood glucose; HDL-C, high-density lipoprotein cholesterol; LDL-C, low-density lipoprotein cholesterol; MET, metabolic equivalent; PA, physical activity; SBP, systolic blood pressure; TC, total cholesterol; TG, triglycerides; WBC, white blood cell; WC, waist circumference.

**Supplementary Table 2.** Comparison of included and excluded participants (n=13,600) <sup>a</sup>

| Characteristics                          | Excluded participants   | Included participants   | P value <sup>b</sup> |
|------------------------------------------|-------------------------|-------------------------|----------------------|
| No. of participants                      | 5,855                   | 7,745                   | -                    |
| Age (years)                              | 41.8 (32.5, 52.6)       | 37.3 (31.5, 45.8)       | <0.0001              |
| Men (%)                                  | 52.4                    | 57.9                    | <0.0001              |
| BMI (kg/m <sup>2</sup> )                 | 24.5 (22.0, 27.1)       | 24.2 (21.7, 26.8)       | <0.0001              |
| WC (cm)                                  | 83.0 (75.0, 92.0)       | 82.0 (74.0, 90.0)       | <0.0001              |
| TC (mmol/L)                              | 4.73 (4.17, 5.38)       | 4.63 (4.09, 5.24)       | <0.0001              |
| TG (mmol/L)                              | 1.14 (0.79, 1.72)       | 1.07 (0.75, 1.63)       | <0.0001              |
| LDL-C (mmol/L)                           | 2.77 (2.27, 3.36)       | 2.69 (2.20, 3.23)       | <0.0001              |
| HDL-C (mmol/L)                           | 1.32 (1.10, 1.60)       | 1.32 (1.10, 1.60)       | 0.75                 |
| FBG (mmol/L)                             | 5.00 (4.70, 5.40)       | 5.00 (4.70, 5.30)       | <0.0001              |
| SBP (mmHg)                               | 120.0 (110.0, 135.0)    | 120.0 (110.0, 130.0)    | <0.0001              |
| DBP (mmHg)                               | 75.0 (70.0, 85.0)       | 75.0 (70.0, 85.0)       | <0.0001              |
| PA (MET × hour/week)                     | 11.6 (3.30, 24.0)       | 11.6 (4.60, 24.1)       | <0.001               |
| Total energy intake (kcal/day)           | 2227.0 (1699.4, 2899.4) | 2288.7 (1796.9, 2904.3) | <0.001               |
| Staple food intake (g/1000 kcal per day) | 239.5 (184.7, 310.1)    | 241.5 (189.7, 311.4)    | 0.01                 |
| Vegetable intake (g/1000 kcal per day)   | 120.5 (88.1, 165.4)     | 122.4 (91.3, 166.3)     | <0.001               |
| Fruit intake (g/1000 kcal per day)       | 144.9 (87.1, 225.1)     | 142.1 (91.0, 210.7)     | 0.15                 |
| Sea food intake (g/1000 kcal per day)    | 13.7 (7.60, 23.7)       | 13.4 (8.12, 21.7)       | 0.13                 |
| Red meat intake (g/1000 kcal per day)    | 20.1 (10.9, 32.0)       | 21.5 (13.0, 32.9)       | <0.0001              |

|                                                                     |                      |                      |         |
|---------------------------------------------------------------------|----------------------|----------------------|---------|
| Total organ meat intake (g/1000 kcal per day)                       | 1.3 (0, 3.62)        | 1.56 (0, 3.66)       | <0.0001 |
| Animal liver intake (g/1000 kcal per day)                           | 0 (0, 2.37)          | 1.27 (0, 2.44)       | <0.0001 |
| animal offal (except for animal liver) intake (g/1000 kcal per day) | 0 (0, 1.48)          | 0 (0, 1.47)          | 0.78    |
| cholesterol intake (mg/1000 kcal per day)                           | 217.3 (167.5, 283.3) | 220.3 (173.4, 280.6) | 0.02    |
| saturated fat intake (g/1000 kcal per day)                          | 4.46 (3.39, 5.88)    | 4.60 (3.60, 5.95)    | <0.0001 |
| Smoking status (%)                                                  |                      |                      | <0.0001 |
| Current smoker                                                      | 22.5                 | 18.0                 |         |
| Ex-smoker                                                           | 6.10                 | 5.45                 |         |
| Non-smoker                                                          | 71.4                 | 76.6                 |         |
| Drinking status (%)                                                 |                      |                      | <0.0001 |
| Everyday                                                            | 5.88                 | 3.10                 |         |
| Sometime                                                            | 53.4                 | 61.4                 |         |
| Ex-drinker                                                          | 9.71                 | 8.94                 |         |
| Non-drinker                                                         | 31.0                 | 26.6                 |         |
| Married (%)                                                         | 81.3                 | 85.4                 | <0.0001 |
| Living alone (%)                                                    | 8.32                 | 7.32                 | <0.001  |
| Education level (college or higher, %)                              | 60.1                 | 80.7                 | <0.0001 |
| Occupation (%)                                                      |                      |                      | <0.0001 |
| Managers                                                            | 39.6                 | 51.8                 |         |
| Professionals                                                       | 15.2                 | 18.6                 |         |
| Other                                                               | 45.2                 | 29.6                 |         |

|                                           |      |      |         |
|-------------------------------------------|------|------|---------|
| Visiting friends (%)                      | 58.0 | 56.1 | <0.001  |
| Household income ( $\geq 10,000$ Yuan, %) | 35.3 | 46.3 |         |
| <b>Healthy sleep pattern (%)</b>          |      |      | <0.001  |
| Healthy                                   | 57.1 | 66.7 |         |
| Immediate                                 | 31.2 | 23.8 |         |
| Poor                                      | 11.7 | 9.47 |         |
| Individual history of disease (%)         |      |      |         |
| Hypertension                              | 27.6 | 21.5 | <0.001  |
| Hyperlipidemia                            | 47.4 | 43.1 | <0.0001 |
| Diabetes                                  | 7.48 | 4.82 | <0.0001 |
| Family history of disease (%)             |      |      |         |
| CVD                                       | 30.0 | 33.9 | <0.0001 |
| Hypertension                              | 48.7 | 55.5 | <0.0001 |
| Hyperlipidemia                            | 0.33 | 0.46 | 0.05    |
| Diabetes                                  | 24.6 | 29.3 | <0.0001 |

<sup>a</sup> Continuous variables are expressed as medians (P25, P75) and categorical variables are expressed as percentages. BMI, body mass index; CVD, cardiovascular disease; DBP, diastolic blood pressure; FBG, fasting blood glucose; HDL-C, high-density lipoprotein cholesterol; LDL-C, low-density lipoprotein cholesterol; MET, metabolic equivalent; PA, physical activity; SBP, systolic blood pressure; TC, total cholesterol; TG, triglycerides; WBC, white blood cell; WC, waist circumference.

<sup>b</sup> P values are based on Wilcoxon signed-rank test or chi-square test.

**Supplementary Table 3.** Association between animal offal intake and risk of depressive symptom in the TCLSIH Cohort Study (n=7,745)

|                                 | Quartiles of animal offal intake (g/day) |                                |                   |                   | <i>P</i> for trend <sup>a</sup> |
|---------------------------------|------------------------------------------|--------------------------------|-------------------|-------------------|---------------------------------|
|                                 | Almost never                             | Tertile 1                      | Tertile 2         | Tertile 3         |                                 |
| Median (min, max) intake        | 0.00 (0.00, 0.00)                        | 3.55 (2.84, 3.55)              | 7.10 (5.68, 7.15) | 14.3 (8.56, 150)  |                                 |
| No. of depressive symptom       | 410                                      | 205                            | 213               | 273               |                                 |
| Person years                    | 7,378                                    | 4,016                          | 3,766             | 3,914             |                                 |
| Incidence per 1000 person years | 55.57                                    | 51.05                          | 56.56             | 69.75             |                                 |
| Model 1                         | 1.00 (reference)                         | 0.93 (0.79, 1.11) <sup>b</sup> | 1.05 (0.89, 1.24) | 1.32 (1.12, 1.55) | <0.001                          |
| Model 2                         | 1.00 (reference)                         | 0.96 (0.81, 1.14)              | 1.08 (0.91, 1.28) | 1.33 (1.13, 1.57) | <0.001                          |
| Model 3                         | 1.00 (reference)                         | 0.97 (0.82, 1.15)              | 1.07 (0.90, 1.28) | 1.32 (1.11, 1.57) | <0.001                          |

<sup>a</sup> Obtained by using multivariable Cox regression model.

<sup>b</sup> Hazard ratios (95% confidence interval) (all such values).

Model 1 was adjusted for age (continuous: years), sex (men or women), and body mass index (continuous: kg/m<sup>2</sup>).

Model 2 was additionally adjusted for smoking status (current, former, or never), alcohol drinking status (everyday drinker, sometime drinker, ex-drinker, or non-drinker), married (yes or no), education level (college graduate or not), occupation (managers, professionals, or other), visiting friends (yes or no), living alone (yes or no), household income ( $\leq$  or  $>$ 10,000 Yuan), physical activity (continuous: MET-hour/week), healthy sleep pattern (healthy, immediate, or poor), family history of disease (including cardiovascular disease, hypertension, hyperlipidemia, and diabetes [each yes or no]), hypertension (yes or no), hyperlipidemia (yes or no), diabetes (yes or no), total energy intake (continuous: kcal/day).

Model 3 was additionally adjusted for staple food intake (continuous: g/1000 kcal per day), vegetable intake (continuous: g/1000 kcal per day), fruit intake (continuous: g/1000 kcal per day), red meat intake (continuous: g/1000 kcal per day), and seafood intake (continuous: g/1000 kcal per day).

**Supplementary Table 4.** Association between energy-adjusted animal offal intake and risk of depressive symptom in the TCLSIH Cohort Study (n=7,745)

|                                 | Categories of energy-adjusted animal offal intake (g/1000 kcal per day) |                                |                   |                   |                   |                   | □ | P for trend <sup>a</sup> |
|---------------------------------|-------------------------------------------------------------------------|--------------------------------|-------------------|-------------------|-------------------|-------------------|---|--------------------------|
|                                 | Almost never                                                            | Q1                             | Q2                | Q3                | Q4                | Q5                |   |                          |
| Median (min, max) intake        | 0.00 (0.00, 0.00)                                                       | 1.36 (0.93, 1.63)              | 2.06 (1.63, 2.64) | 3.12 (2.64, 3.73) | 5.20 (3.73, 9.31) | 13.4 (9.33, 30.7) |   |                          |
| No. of depressive symptom       | 410                                                                     | 117                            | 124               | 136               | 145               | 169               |   |                          |
| Person years                    | 7,378                                                                   | 2,387                          | 2,410             | 2,296             | 2,305             | 2,298             |   |                          |
| Incidence per 1000 person years | 55.57                                                                   | 49.02                          | 51.45             | 59.23             | 62.91             | 73.54             |   |                          |
| Model 1                         | 1.00 (reference)                                                        | 0.89 (0.72, 1.09) <sup>b</sup> | 0.94 (0.77, 1.15) | 1.10 (0.91, 1.34) | 1.18 (1.01, 1.40) | 1.57 (1.26, 1.96) |   | <0.001                   |
| Model 2                         | 1.00 (reference)                                                        | 0.95 (0.77, 1.18)              | 0.97 (0.79, 1.19) | 1.13 (0.93, 1.38) | 1.16 (0.98, 1.38) | 1.54 (1.23, 1.93) |   | <0.001                   |
| Model 3                         | 1.00 (reference)                                                        | 0.96 (0.77, 1.19)              | 0.98 (0.80, 1.20) | 1.13 (0.93, 1.39) | 1.16 (0.98, 1.38) | 1.52 (1.22, 1.90) |   | <0.001                   |

<sup>a</sup> Obtained by using multivariable Cox regression model.

<sup>b</sup> Hazard ratios (95% confidence interval) (all such values).

Model 1 was adjusted for age (continuous: years), sex (men or women), and body mass index (continuous: kg/m<sup>2</sup>).

Model 2 was additionally adjusted for smoking status (current, former, or never), alcohol drinking status (everyday drinker, sometime drinker, ex-drinker, or non-drinker), married (yes or no), education level (college graduate or not), occupation (managers, professionals, or other), visiting friends (yes or no), living alone (yes or no), household income ( $\leq$  or  $>10,000$  Yuan), physical activity (continuous: MET-hour/week), healthy sleep pattern (healthy, immediate, or poor), family history of disease (including cardiovascular disease, hypertension, hyperlipidemia, and diabetes [each yes or no]), hypertension (yes or no), hyperlipidemia (yes or no), diabetes (yes or no), total energy intake (continuous: kcal/day).

Model 3 was additionally adjusted for staple food intake (continuous: g/1000 kcal per day), vegetable intake (continuous: g/1000 kcal per



day), fruit intake (continuous: g/1000 kcal per day), red meat intake (continuous: g/1000 kcal per day), and seafood intake (continuous: g/1000 kcal per day).
